# Supplementary material for: Integrating proteomics with electrochemistry for identifying kinase biomarkers
Source: Chem Sci. 2015 May 22;6(8):4756–66. doi: 10.1039/c5sc00560d (PMC5667508; doi:10.1039/c5sc00560d)
Supplement: Supplementary file 2 [file SC-006-C5SC00560D-s002.xlsx]

## Sheet: 198 protien-303T divide 303N >2
Protein ACC. No.	Gene Name	Protein Name	Peptide sequence	m/z	Charge	Modification site	Score	Start pos	End pos	Protein Mass	303N abun.	303T abun.	303T/ 303N	Cancer (MetacoreTM)
P13639	EEF2	Elongation factor 2	AGETRFTDTR	617.267	2	AGETRFT[Phospho (ST)]DTR	35.57	51	60	95277	87.914	3601.94	40.971
P13796	LCP1	Plastin-2	EGESLEDLMK	623.752	2	EGES[Phospho (ST)]LEDLM[Oxidation (M)]K	63.66	254	263	70245	38.842	1488.15	38.313	✓
Q9UJ70	NAGK	N-acetyl-D-glucosamine kinase	SLGLSLSGGDQEDAGR	821.363	2	SLGLSLS[Phospho (ST)]GGDQEDAGR	109	70	85	37352	21.278	814.187	38.264
P08670	VIM	Vimentin	ETNLDSLPLVDTHSK	583.608	3	ETNLDS[Phospho (ST)]LPLVDTHSK	81.1	425	439	53619	83.642	2978.42	35.609	✓
P29692	EEF1D	Elongation factor 1-delta	ATAPQTQHVSPMR	760.344	2	ATAPQTQHVS[Phospho (ST)]PM[Oxidation (M)]R	47.74	124	136	31103	72.69	2028.4	27.905	✓
Q53T59	HS1BP3	HCLS1-binding protein 3	KLSPQDPSEDVSSVDPLK	674.323	3	KLS[Phospho (ST)]PQDPSEDVSSVDPLK	82.63	247	264	42754	40.479	1059.72	26.18
P00558	PGK1	Phosphoglycerate kinase 1	ALESPERPFLAILGGAK	616.99	3	ALES[Phospho (ST)]PERPFLAILGGAK	66.75	200	216	44586	32.994	818.249	24.8	✓
Q13586	STIM1	Stromal interaction molecule 1	AEQSLHDLQER	703.309	2	AEQS[Phospho (ST)]LHDLQER	62.86	254	264	77375	193.993	4272.86	22.026	✓
P08238	HSP90AB1	Heat shock protein HSP 90-beta	IEDVGSDEEDDSGKDKK	973.404	2	IEDVGS[Phospho (ST)]DEEDDSGKDKK	128.33	250	266	83212	416.679	9053	21.727	✓
Q9Y3L3	SH3BP1	SH3 domain-binding protein 1	ERTESEVPPRPASPK	587.285	3	ERTESEVPPRPAS[Phospho (ST)]PK	31.07	532	546	75666	82.519	1706.52	20.68
O60832	DKC1	H/ACA ribonucleoprotein complex subunit 4	AGLESGAEPGDGDSDTTKK	638.937	3	AGLESGAEPGDGDS[Phospho (ST)]DTTKK	36.39	481	499	57638	51.16	1017.12	19.881	✓
P51991	HNRNPA3	Heterogeneous nuclear ribonucleoprotein A3	SSGSPYGGGYGSGGGSGGYGSR	995.881	2	SSGSPY[Phospho (Y)]GGGYGSGGGSGGYGSR	54.07	355	376	39571	17.051	331.831	19.461	✓
P18583	SON	SON protein	RRSFSISPVR	482.202	3	RRS[Phospho (ST)]FS[Phospho (ST)]IS[Phospho (ST)]PVR	43.11	2007	2016	263680	134.954	2494.14	18.481	✓
Q9UQ35	SRRM2	Serine/arginine repetitive matrix protein 2	THTTALAGRSPSPASGR	609.603	3	THTT[Phospho (ST)]ALAGRSPS[Phospho (ST)]PASGR	34.18	286	302	299438	484.152	8722.04	18.015	✓
P08670	VIM	Vimentin	ISLPLPNFSSLNLR	825.94	2	ISLPLPNFSS[Phospho (ST)]LNLR	87.62	411	424	53619	463.536	7834.12	16.901	✓
P29692	EEF1D	Elongation factor 1-delta	KPATPAEDDEDDDIDLFGSDNEEEDKEAAQLR	1219.87	3	KPATPAEDDEDDDIDLFGS[Phospho (ST)]DNEEEDKEAAQLR	139.17	144	175	31103	15.538	260.662	16.776	✓
P50479	PDLIM4	PDZ and LIM domain protein 4	IHIDPEIQDGSPTTSR	923.419	2	IHIDPEIQDGS[Phospho (ST)]PTTSR	48.22	102	117	35376	14.89	242.046	16.255	✓
Q13523	PRPF4B	Serine/threonine-protein kinase PRP4 homolog	KKSPIINESR	626.33	2	KKS[Phospho (ST)]PIINESR	27.59	275	284	116902	33.594	535.399	15.937	✓
Q86VM9	ZC3H18	Zinc finger CCCH domain-containing protein 18	LGVSVSPSR	491.242	2	LGVSVS[Phospho (ST)]PSR	75.26	529	537	106296	356.723	5502.93	15.426	✓
Q9Y2V2	CARHSP1	Calcium-regulated heat stable protein 1	ERSPSPLRGNVVPSPLPTR	740.362	3	ERS[Phospho (ST)]PS[Phospho (ST)]PLRGNVVPSPLPTR	67.88	28	46	15882	34.174	475.606	13.917
P29803	PDHA2	Pyruvate dehydrogenase E1 component subunit alpha, testis-specific form, mitochondrial	YHGHSMSDPGVSYR	563.556	3	YHGHS[Phospho (ST)]M[Oxidation (M)]SDPGVSYR	27.13	287	300	42906	212.669	2816.42	13.243
Q8WX93	PALLD	Palladin	SRDSGDENEPIQER	856.355	2	SRDS[Phospho (ST)]GDENEPIQER	46.76	1118	1131	150443	116.114	1537.22	13.239	✓
P29692	EEF1D	Elongation factor 1-delta	ATAPQTQHVSPMR	501.897	3	ATAPQT[Phospho (ST)]QHVSPMR	65.51	124	136	31103	1164.4	15354.5	13.187	✓
Q9UPU5	USP24	Ubiquitin carboxyl-terminal hydrolase 24	TISAQDTLAYATALLNEK	668.334	3	TIS[Phospho (ST)]AQDTLAYATALLNEK	58.74	2559	2576	294178	29.432	387.932	13.181	✓
P29692	EEF1D	Elongation factor 1-delta	ATAPQTQHVSPMR	501.901	3	ATAPQTQHVS[Phospho (ST)]PMR	63.31	124	136	31103	1172.78	15351.8	13.09	✓
Q96MU7	YTHDC1	YTH domain-containing protein 1	GISPIVFDR	542.271	2	GIS[Phospho (ST)]PIVFDR	46.03	306	314	84649	39.162	482.417	12.318
P49736	MCM2	DNA replication licensing factor MCM2	GLLYDSDEEDEERPAR	987.409	2	GLLYDS[Phospho (ST)]DEEDEERPAR	44.57	134	149	101832	14.206	171.93	12.103	✓
Q13586	STIM1	Stromal interaction molecule 1	AEQSLHDLQER	469.208	3	AEQS[Phospho (ST)]LHDLQER	44.51	254	264	77375	718.793	8644.81	12.027	✓
Q709C8	VPS13C	Vacuolar protein sorting-associated protein 13C	TTNSSLEEIMDK	724.313	2	TTNSS[Phospho (ST)]LEEIMDK	68.88	733	744	422124	33.018	392.302	11.881
P08575	PTPRC	Leukocyte common antigen	NSNVIPYDYNR	717.805	2	NS[Phospho (ST)]NVIPYDYNR	44.82	972	982	147162	19.38	228.719	11.802	✓
P18754	RCC1	Regulator of chromosome condensation	RRSPPADAIPK	429.891	3	RRS[Phospho (ST)]PPADAIPK	40.05	9	19	44941	1484.59	17322.5	11.668	✓
O75351	VPS4B	Vacuolar protein sorting-associated protein 4B	EGQPSPADEKGNDSDGEGESDDPEK	890.341	3	EGQPSPADEKGNDS[Phospho (ST)]DGEGESDDPEK	62.35	89	113	49271	44.746	518.765	11.594
P60174	TPI1	Triosephosphate isomerase	KQSLGELIGTLNAAK	811.944	2	KQS[Phospho (ST)]LGELIGTLNAAK	42.19	19	33	26653	94.745	1087.42	11.477	✓
P62753	RPS6	40S ribosomal protein S6	RLSSLR	406.213	2	RLSS[Phospho (ST)]LR	40.26	233	238	28663	1089.77	12500.7	11.471	✓
P26368	U2AF2	Splicing factor U2AF 65 kDa subunit	EEHGGLIRSPR	665.817	2	EEHGGLIRS[Phospho (ST)]PR	35.43	71	81	53467	198.494	2260.49	11.388
O43765	SGTA	Small glutamine-rich tetratricopeptide repeat-containing protein alpha	SPARTPPSEEDSAEAER	636.937	3	SPART[Phospho (ST)]PPSEEDSAEAER	97.36	77	93	34042	81.78	907.68	11.099
P29590	PML	Probable transcription factor PML	AVSPPHLDGPPSPR	529.566	3	AVS[Phospho (ST)]PPHLDGPPS[Phospho (ST)]PR	69.97	516	529	97489	354.812	3886.75	10.954	✓
Q9UQ35	SRRM2	Serine/arginine repetitive matrix protein 2	RGEGDAPFSEPGTTSTQRPSSPETATK	957.763	3	RGEGDAPFSEPGTTSTQRPSS[Phospho (ST)]PETATK	64.86	303	329	299438	22.398	244.465	10.914	✓
P13796	LCP1	Plastin-2	EGESLEDLMK	615.755	2	EGES[Phospho (ST)]LEDLMK	88.23	254	263	70245	320.68	3459.1	10.787	✓
P29692	EEF1D	Elongation factor 1-delta	ATAPQTQHVSPMR	507.228	3	ATAPQTQHVS[Phospho (ST)]PM[Oxidation (M)]R	38.02	124	136	31103	1199.1	12920	10.775	✓
Q9UQ35	SRRM2	Serine/arginine repetitive matrix protein 2	SRTPPSAPSQSR	450.879	3	SRT[Phospho (ST)]PPSAPSQSR	40.76	2407	2418	299438	57.282	611.014	10.667	✓
O43399	TPD52L2	Tumor protein D54	NSATFKSFEDR	461.193	3	NSATFKS[Phospho (ST)]FEDR	52.44	160	170	22224	105.471	1100.37	10.433	✓
Q5TCZ1	SH3PXD2A	SH3 and PX domain-containing protein 2A	AQISSPNLR	533.253	2	AQIS[Phospho (ST)]SPNLR	32.3	417	425	125213	82.473	840.65	10.193
P17096	HMGA1	High mobility group protein HMG-I/HMG-Y	KLEKEEEEGISQESSEEEQ	772.991	3	KLEKEEEEGISQES[Phospho (ST)]SEEEQ	74.99	89	107	11669	362.226	3684.17	10.171	✓
P08670	VIM	Vimentin	ISLPLPNFSSLNLR	550.959	3	ISLPLPNFSS[Phospho (ST)]LNLR	87.24	411	424	53619	173.083	1757.4	10.153	✓
P06737	PYGL	Glycogen phosphorylase, liver form	RQISIR	426.726	2	RQIS[Phospho (ST)]IR	30.61	12	17	97087	138.793	1346.97	9.705
P08575	PTPRC	Leukocyte common antigen	NRNSNVIPYDYNR	852.884	2	NRNS[Phospho (ST)]NVIPYDYNR	58.14	970	982	147162	199.632	1928.4	9.66	✓
P08575	PTPRC	Leukocyte common antigen	NRNSNVIPYDYNR	852.875	2	NRNS[Phospho (ST)]NVIPYDYNR	50.22	970	982	147162	201.272	1924.33	9.561	✓
P17096	HMGA1	High mobility group protein HMG-I/HMG-Y	KLEKEEEEGISQESSEEEQ	799.645	3	KLEKEEEEGISQES[Phospho (ST)]S[Phospho (ST)]EEEQ	84.71	89	107	11669	518.337	4853.08	9.363	✓
Q9UK76	HN1	Hematological and neurological expressed 1 protein	RNSSEASSGDFLDLK	569.255	3	RNSS[Phospho (ST)]EASSGDFLDLK	69.83	85	99	16005	144.729	1354.81	9.361	✓
P62995	TRA2B	Transformer-2 protein homolog beta	RRSPSPYYSR	476.866	3	RRS[Phospho (ST)]PS[Phospho (ST)]PYYSR	44.3	262	271	33646	3274.83	30611.1	9.347
P08238	HSP90AB1	Heat shock protein HSP 90-beta	IEDVGSDEEDDSGKDK	909.356	2	IEDVGS[Phospho (ST)]DEEDDSGKDK	139.01	250	265	83212	1884.02	17491.7	9.284	✓
P0C7M2	HNRPA1L3	Putative heterogeneous nuclear ribonucleoprotein A1-like protein 3	SESPKEPEQLRK	377.683	4	SES[Phospho (ST)]PKEPEQLRK	33.43	4	15	34202	216.995	1994.22	9.19
Q13595	TRA2A	Transformer-2 protein homolog alpha	RRSPSPYYSR	450.21	3	RRS[Phospho (ST)]PSPYYSR	37.96	258	267	32669	203.558	1853.48	9.105	✓
P46821	MAP1B	Microtubule-associated protein 1B	KLGDVSPTQIDVSQFGSFK	711.678	3	KLGDVS[Phospho (ST)]PTQIDVSQFGSFK	51.14	1496	1514	270454	46.376	409.265	8.825	✓
P13611	VCAN	Versican core protein	QEIESETTSEEQIQEEK	1058.95	2	QEIESETTS[Phospho (ST)]EEQIQEEK	69.37	2108	2124	372590	44.169	389.742	8.824	✓
Q07955	SFRS1	Splicing factor, arginine/serine-rich 1	VDGPRSPSYGR	424.191	3	VDGPRS[Phospho (ST)]PSYGR	33.35	194	204	27728	426.312	3693.41	8.664	✓
Q8IYB3	SRRM1	Serine/arginine repetitive matrix protein 1	KVELSESEEDKGGK	538.911	3	KVELSES[Phospho (ST)]EEDKGGK	49.23	459	472	102274	216.521	1855.81	8.571
Q9UKM9	RALY	RNA-binding protein Raly	GRLSPVPVPR	579.314	2	GRLS[Phospho (ST)]PVPVPR	40.33	132	141	32444	1793.61	15309.1	8.535	✓
Q13459	MYO9B	Myosin-IXb	VQEKPDSPGGSTQIQR	602.943	3	VQEKPDS[Phospho (ST)]PGGSTQIQR	54.29	1284	1299	243406	249.412	2112.38	8.469	✓
Q13557	CAMK2D	Calcium/calmodulin-dependent protein kinase type II delta chain	KPDGVKESTESSNTTIEDEDVK	830.033	3	KPDGVKEST[Phospho (ST)]ESSNTTIEDEDVK	73.97	323	344	56334	31.66	267.041	8.435
P29692	EEF1D	Elongation factor 1-delta	ATAPQTQHVSPMR	752.344	2	ATAPQTQHVS[Phospho (ST)]PMR	85.97	124	136	31103	457.457	3819.04	8.348	✓
Q8NE71	ABCF1	ATP-binding cassette sub-family F member 1	KAEQGSEEEGEGEEEEEEGGESK	854.664	3	KAEQGS[Phospho (ST)]EEEGEGEEEEEEGGESK	106.84	223	245	95866	139.732	1164.19	8.332	✓
P07199	CENPB	Major centromere autoantigen B	RAILASER	498.249	2	RAILAS[Phospho (ST)]ER	27.78	50	57	65132	404.612	3353.86	8.289
P08238	HSP90AB1	Heat shock protein HSP 90-beta	IEDVGSDEEDDSGK	787.787	2	IEDVGS[Phospho (ST)]DEEDDSGK	109.42	250	263	83212	613.326	5083.04	8.288	✓
P15924	DSP	Desmoplakin	SMSFQGIR	511.212	2	SM[Oxidation (M)]S[Phospho (ST)]FQGIR	31.87	2207	2214	331569	180.083	1443.3	8.015	✓
Q8IYB3	SRRM1	Serine/arginine repetitive matrix protein 1	KVELSESEEDKGGK	538.913	3	KVELS[Phospho (ST)]ESEEDKGGK	46.5	459	472	102274	244.598	1901.92	7.776
Q15773	MLF2	Myeloid leukemia factor 2	LAIQGPEDSPSR	675.31	2	LAIQGPEDS[Phospho (ST)]PSR	63.48	230	241	28129	329.547	2559.76	7.768
O94956	SLCO2B1	Solute carrier organic anion transporter family member 2B1	VLAVTDSPAR	554.772	2	VLAVTDS[Phospho (ST)]PAR	49.13	314	323	76649	90.223	697.704	7.733
Q92598	HSPH1	Heat shock protein 105 kDa	IESPKLER	526.261	2	IES[Phospho (ST)]PKLER	51.71	807	814	96804	718.897	5487.49	7.633
O14874	BCKDK	[3-methyl-2-oxobutanoate dehydrogenase [lipoamide]] kinase, mitochondrial	STSATDTHHVEMAR	541.561	3	ST[Phospho (ST)]SATDTHHVEMAR	39.33	31	44	46331	308.576	2338.23	7.577
P05455	SSB	Lupus La protein	FASDDEHDEHDENGATGPVKR	602.248	4	FAS[Phospho (ST)]DDEHDEHDENGATGPVKR	74.64	364	384	46808	485.837	3643.6	7.5	✓
Q9UKM9	RALY	RNA-binding protein Raly	GRLSPVPVPR	386.544	3	GRLS[Phospho (ST)]PVPVPR	32.2	132	141	32444	640.376	4717.74	7.367	✓
Q7Z5R6	APBB1IP	Amyloid beta A4 precursor protein-binding family B member 1-interacting protein	RSSDTSGSPATPLK	495.235	3	RSS[Phospho (ST)]DTSGSPATPLK	37.4	524	537	73137	200.006	1456.78	7.284	✓
P27824	CANX	Calnexin	QKSDAEEDGGTVSQEEEDR	1094.95	2	QKS[Phospho (ST)]DAEEDGGTVSQEEEDR	75.1	552	570	67526	36.757	263.033	7.156	✓
P15924	DSP	Desmoplakin	SMSFQGIR	503.217	2	SMS[Phospho (ST)]FQGIR	53.8	2207	2214	331569	160.146	1140.62	7.122	✓
Q14004	CDC2L5	Cell division cycle 2-like protein kinase 5	ILELTPEPDRPR	505.925	3	ILELT[Phospho (ST)]PEPDRPR	30.61	1242	1253	164823	49.982	353.634	7.075	✓
Q9H4L5	OSBPL3	Oxysterol-binding protein-related protein 3	ALVHQLSNESR	445.212	3	ALVHQLS[Phospho (ST)]NESR	31.66	431	441	101160	124.361	858.509	6.903	✓
P50479	PDLIM4	PDZ and LIM domain protein 4	IHIDPEIQDGSPTTSR	615.95	3	IHIDPEIQDGS[Phospho (ST)]PTTSR	63.62	102	117	35376	377.352	2592.53	6.87	✓
P27824	CANX	Calnexin	QKSDAEEDGGTVSQEEEDR	1094.93	2	QKS[Phospho (ST)]DAEEDGGTVSQEEEDR	79.03	552	570	67526	38.772	260.838	6.727	✓
P08238	HSP90AB1	Heat shock protein HSP 90-beta	IEDVGSDEEDDSGKDK	606.572	3	IEDVGS[Phospho (ST)]DEEDDSGKDK	88.93	250	265	83212	8545.67	57391.7	6.716	✓
P37802	TAGLN2	Transgelin-2	NFSDNQLQEGK	680.281	2	NFS[Phospho (ST)]DNQLQEGK	47.49	161	171	22377	168.08	1117.36	6.648	✓
P04049	RAF1	RAF proto-oncogene serine/threonine-protein kinase	SASEPSLHR	532.233	2	SAS[Phospho (ST)]EPSLHR	26.75	619	627	73005	236.82	1537.82	6.494	✓
P49450	CENPA	Histone H3-like centromeric protein A	RRSPSPTPTPGPSR	551.584	3	RRS[Phospho (ST)]PS[Phospho (ST)]PTPTPGPSR	31.85	15	28	15981	469.619	2996.23	6.38	✓
P18206	VCL	Vinculin	GQGSSPVAMQK	585.258	2	GQGSS[Phospho (ST)]PVAMQK	42.58	342	352	123722	72.789	464.156	6.377	✓
Q8WX93	PALLD	Palladin	SRSRDSGDENEPIQER	678.936	3	SRS[Phospho (ST)]RDS[Phospho (ST)]GDENEPIQER	53.08	1116	1131	150443	224.519	1430.34	6.371	✓
Q92598	HSPH1	Heat shock protein 105 kDa	IESPKLER	351.177	3	IES[Phospho (ST)]PKLER	43.46	807	814	96804	415.587	2639.3	6.351
Q92934	BAD	Bcl2 antagonist of cell death	SRSAPPNLWAAQR	511.913	3	SRS[Phospho (ST)]APPNLWAAQR	34.39	97	109	18381	57.802	364.491	6.306	✓
O95819	MAP4K4	Mitogen-activated protein kinase kinase kinase kinase 4	TTSRSPVLSR	395.198	3	TTS[Phospho (ST)]RSPVLSR	48.27	627	636	142013	247.226	1536.08	6.213	✓
P05455	SSB	Lupus La protein	TKFASDDEHDEHDENGATGPVK	620.504	4	TKFAS[Phospho (ST)]DDEHDEHDENGATGPVK	43.67	362	383	46808	110.007	682.638	6.205	✓
P43243	MATR3	Matrin-3	SYSPDGKESPSDKK	535.568	3	SYS[Phospho (ST)]PDGKESPSDKK	51.91	596	609	94565	213.68	1313.93	6.149	✓
Q9P035	PTPLAD1	Protein tyrosine phosphatase-like protein PTPLAD1	RPLFLAPDFDRWLDESDAEMELR	726.082	4	RPLFLAPDFDRWLDES[Phospho (ST)]DAEMELR	63.55	99	121	43132	42.082	257.367	6.116
O43399	TPD52L2	Tumor protein D54	NSATFKSFEDR	461.2	3	NSATFKS[Phospho (ST)]FEDR	39.58	160	170	22224	180.873	1094.77	6.053	✓
Q9H0D6	XRN2	5'-3' exoribonuclease 2	KAEDSDSEPEPEDNVR	659.577	3	KAEDS[Phospho (ST)]DS[Phospho (ST)]EPEPEDNVR	37.1	495	510	108513	291.569	1757.34	6.027
P51858	HDGF	Hepatoma-derived growth factor	AGDLLEDSPKRPK	753.376	2	AGDLLEDS[Phospho (ST)]PKRPK	64.04	158	170	26772	664.751	4000.19	6.018	✓
P08238	HSP90AB1	Heat shock protein HSP 90-beta	IEDVGSDEEDDSGKDKK	487.203	4	IEDVGS[Phospho (ST)]DEEDDSGKDKK	50.92	250	266	83212	3871.24	23189.3	5.99	✓
P51858	HDGF	Hepatoma-derived growth factor	GNAEGSSDEEGKLVIDEPAKEK	821.356	3	GNAEGS[Phospho (ST)]S[Phospho (ST)]DEEGKLVIDEPAKEK	75.8	127	148	26772	268.107	1604.27	5.984	✓
P23193	TCEA1	Transcription elongation factor A protein 1	KKEPAITSQNSPEAR	579.286	3	KKEPAITSQNS[Phospho (ST)]PEAR	74.59	90	104	33948	514.832	3012.04	5.851	✓
Q8IYB3	SRRM1	Serine/arginine repetitive matrix protein 1	KVELSESEEDKGGK	565.572	3	KVELS[Phospho (ST)]ES[Phospho (ST)]EEDKGGK	39.37	459	472	102274	221.352	1281.18	5.788
P17096	HMGA1	High mobility group protein HMG-I/HMG-Y	KLEKEEEEGISQESSEEEQ	772.999	3	KLEKEEEEGISQES[Phospho (ST)]SEEEQ	30.48	89	107	11669	400.054	2313.72	5.784	✓
Q8IYB3	SRRM1	Serine/arginine repetitive matrix protein 1	RYSPPIQR	548.769	2	RYS[Phospho (ST)]PPIQR	34.12	595	602	102274	888.634	5119.85	5.761
P25788	PSMA3	Proteasome subunit alpha type-3	ESLKEEDESDDDNM	876.301	2	ES[Phospho (ST)]LKEEDESDDDNM[Oxidation (M)]	88.46	242	255	28415	425.553	2435.5	5.723
P08559	PDHA1	Pyruvate dehydrogenase E1 component subunit alpha, somatic form, mitochondrial	YHGHSMSDPGVSYR	558.222	3	YHGHS[Phospho (ST)]MSDPGVSYR	43.51	289	302	43268	379.513	2133.63	5.622	✓
P0C7M2	HNRPA1L3	Putative heterogeneous nuclear ribonucleoprotein A1-like protein 3	SESPKEPEQLR	690.316	2	SES[Phospho (ST)]PKEPEQLR	49.14	4	14	34202	3349.03	18812.3	5.617
Q9H3U1	UNC45A	Protein unc-45 homolog A	DSIRIR	420.21	2	DS[Phospho (ST)]IRIR	27.09	492	497	103011	205.367	1145.29	5.577
Q9UQ35	SRRM2	Serine/arginine repetitive matrix protein 2	RRPSPQPSPR	419.879	3	RRPS[Phospho (ST)]PQPSPR	36.94	2699	2708	299438	343.969	1900.45	5.525	✓
Q13085	ACACA	Acetyl-CoA carboxylase 1	SSMSGLHLVK	569.771	2	SSMS[Phospho (ST)]GLHLVK	43.73	77	86	265385	139.508	768.114	5.506	✓
Q8WX93	PALLD	Palladin	SRDSGDENEPIQER	571.235	3	SRDS[Phospho (ST)]GDENEPIQER	68.82	1118	1131	150443	1097.61	6034.27	5.498	✓
Q9HCN4	GPN1	GPN-loop GTPase 1	GTLDEEDEEADSDTDDIDHR	786.295	3	GTLDEEDEEADS[Phospho (ST)]DTDDIDHR	101.34	327	346	41714	98.676	538.059	5.453
Q14764	MVP	Major vault protein	GEKDTAKSLQPLAPR	564.287	3	GEKDTAKS[Phospho (ST)]LQPLAPR	49.1	438	452	99266	167.249	907.816	5.428	✓
P25788	PSMA3	Proteasome subunit alpha type-3	ESLKEEDESDDDNM	584.534	3	ES[Phospho (ST)]LKEEDESDDDNM[Oxidation (M)]	28.94	242	255	28415	179.227	949.648	5.299
O60486	PLXNC1	Plexin-C1	KQSQQLELLESELR	594.302	3	KQS[Phospho (ST)]QQLELLESELR	46.35	976	989	175630	35.349	184.425	5.217
Q13428	TCOF1	Treacle protein	TSQVGAASAPAKESPR	546.258	3	TSQVGAASAPAKES[Phospho (ST)]PR	33.61	368	383	152013	199.838	1041.93	5.214	✓
Q9H4L5	OSBPL3	Oxysterol-binding protein-related protein 3	ALVHQLSNESR	667.313	2	ALVHQLS[Phospho (ST)]NESR	43.16	431	441	101160	134.311	695.847	5.181	✓
Q8IYB3	SRRM1	Serine/arginine repetitive matrix protein 1	HRPSPPATPPPK	481.219	3	HRPS[Phospho (ST)]PPAT[Phospho (ST)]PPPK	33.21	399	410	102274	1050.58	5440.17	5.178
Q9P2M7	CGN	Cingulin	RAAVETTLR	548.769	2	RAAVET[Phospho (ST)]TLR	30.82	712	720	136304	998.501	5133.5	5.141	✓
Q13428	TCOF1	Treacle protein	TSQVGAASAPAKESPR	546.27	3	TSQVGAASAPAKES[Phospho (ST)]PR	38.28	368	383	152013	202.691	1040.38	5.133	✓
O14874	BCKDK	[3-methyl-2-oxobutanoate dehydrogenase [lipoamide]] kinase, mitochondrial	STSATDTHHVEMAR	546.891	3	ST[Phospho (ST)]SATDTHHVEM[Oxidation (M)]AR	28.75	31	44	46331	170.309	867.436	5.093
P08238	HSP90AB1	Heat shock protein HSP 90-beta	IEDVGSDEEDDSGKDKK	649.27	3	IEDVGS[Phospho (ST)]DEEDDSGKDKK	80.44	250	266	83212	9455.94	48012.2	5.077	✓
Q13283	G3BP1	Ras GTPase-activating protein-binding protein 1	SSSPAPADIAQTVQEDLR	982.952	2	SS[Phospho (ST)]SPAPADIAQTVQEDLR	72.77	230	247	52132	253.354	1275.35	5.034	✓
O43847	NRD1	Nardilysin	RGSLSNAGDPEIVK	508.247	3	RGS[Phospho (ST)]LSNAGDPEIVK	69.22	92	105	131488	663.537	3327.71	5.015
Q9BX66	SORBS1	Sorbin and SH3 domain-containing protein 1	ETPSSSPASPQETR	777.333	2	ETPSSSPAS[Phospho (ST)]PQETR	61.48	81	94	142410	249.898	1242.52	4.972	✓
O00264	PGRMC1	Membrane-associated progesterone receptor component 1	GDQPAASGDSDDDEPPPLPR	1058.43	2	GDQPAASGDS[Phospho (ST)]DDDEPPPLPR	111.62	48	67	21658	119.062	590.186	4.957
P25788	PSMA3	Proteasome subunit alpha type-3	ESLKEEDESDDDNM	876.296	2	ESLKEEDES[Phospho (ST)]DDDNM[Oxidation (M)]	67.27	242	255	28415	495.701	2433.98	4.91
P0C7M2	HNRPA1L3	Putative heterogeneous nuclear ribonucleoprotein A1-like protein 3	SESPKEPEQLRK	503.243	3	SES[Phospho (ST)]PKEPEQLRK	55.43	4	15	34202	6157.33	29836.3	4.846
P08575	PTPRC	Leukocyte common antigen	NRNSNVIPYDYNR	568.926	3	NRNS[Phospho (ST)]NVIPYDYNR	41.29	970	982	147162	1408.15	6808.1	4.835	✓
Q9BU76	MMTAG2	Multiple myeloma tumor-associated protein 2	RPAEATSSPTSPERPR	606.953	3	RPAEATSSPTS[Phospho (ST)]PERPR	31.43	210	225	29394	230.21	1088.47	4.728	✓
O43493	TGOLN2	Trans-Golgi network integral membrane protein 2	DSPSKSSAEAQTPEDTPNK	690.291	3	DSPSKSS[Phospho (ST)]AEAQTPEDTPNK	42.59	65	83	51082	271.434	1282.38	4.724
Q8IYB3	SRRM1	Serine/arginine repetitive matrix protein 1	RRSPSPAPPPR	459.878	3	RRS[Phospho (ST)]PS[Phospho (ST)]PAPPPR	31.64	558	568	102274	430.876	2026.57	4.703
P08559	PDHA1	Pyruvate dehydrogenase E1 component subunit alpha, somatic form, mitochondrial	YHGHSMSDPGVSYR	558.23	3	YHGHS[Phospho (ST)]MSDPGVSYR	39.42	289	302	43268	455.493	2140.09	4.698	✓
Q9UQ35	SRRM2	Serine/arginine repetitive matrix protein 2	SSSPVTELASR	607.284	2	SSS[Phospho (ST)]PVTELASR	35.91	1101	1111	299438	189.449	874.301	4.615	✓
P08621	SNRNP70	U1 small nuclear ribonucleoprotein 70 kDa	YDERPGPSPLPHR	534.247	3	YDERPGPS[Phospho (ST)]PLPHR	29.28	219	231	51526	1678.84	7699.05	4.586
Q32P44	EML3	Echinoderm microtubule-associated protein-like 3	KAISSANLLVR	626.347	2	KAIS[Phospho (ST)]SANLLVR	54.68	173	183	95138	296.619	1358.76	4.581
P05455	SSB	Lupus La protein	FASDDEHDEHDENGATGPVK	750.629	3	FAS[Phospho (ST)]DDEHDEHDENGATGPVK	59.22	364	383	46808	198.82	908.048	4.567	✓
Q8IYB3	SRRM1	Serine/arginine repetitive matrix protein 1	APQTSSSPPPVR	652.303	2	APQTS[Phospho (ST)]SSPPPVR	37.75	690	701	102274	462.474	2103.42	4.548
P27824	CANX	Calnexin	QKSDAEEDGGTVSQEEEDRKPK	636.282	4	QKS[Phospho (ST)]DAEEDGGTVSQEEEDRKPK	111.89	552	573	67526	1793.04	8151.21	4.546	✓
P07814	EPRS	Bifunctional aminoacyl-tRNA synthetase	EYIPGQPPLSQSSDSSPTR	1063.48	2	EYIPGQPPLSQSSDSS[Phospho (ST)]PTR	54.21	871	889	170497	87.983	394.552	4.484
P51858	HDGF	Hepatoma-derived growth factor	RAGDLLEDSPKRPK	554.618	3	RAGDLLEDS[Phospho (ST)]PKRPK	63.42	157	170	26772	2329.84	10382.5	4.456	✓
Q13523	PRPF4B	Serine/threonine-protein kinase PRP4 homolog	KKSPIINESR	417.886	3	KKS[Phospho (ST)]PIINESR	48.15	275	284	116902	412.96	1840.32	4.456	✓
P40306	PSMB10	Proteasome subunit beta type-10	TLSSPTEPVKR	432.218	3	TLSS[Phospho (ST)]PTEPVKR	55.52	227	237	28918	190.977	835.064	4.373	✓
Q9BTU6	PI4K2A	Phosphatidylinositol 4-kinase type 2-alpha	SSSESYTQSFQSR	787.327	2	SSS[Phospho (ST)]ESYTQSFQSR	66.15	460	472	53989	174.787	760.458	4.351	✓
P46937	YAP1	65 kDa Yes-associated protein	GDSETDLEALFNAVMNPK	677.628	3	GDS[Phospho (ST)]ETDLEALFNAVMNPK	52.06	59	76	48725	114.027	494.477	4.337	✓
Q9NYF8	BCLAF1	Bcl-2-associated transcription factor 1	IDISPSTLR	541.269	2	IDIS[Phospho (ST)]PSTLR	66.25	655	663	106059	2317.64	9992.98	4.312	✓
P17661	DES	Desmin	TFGGAPGFPLGSPLSSPVFPR	723.357	3	TFGGAPGFPLGS[Phospho (ST)]PLSSPVFPR	58.66	17	37	53503	107.198	462.224	4.312	✓
P27824	CANX	Calnexin	QKSDAEEDGGTVSQEEEDRKPK	636.278	4	QKSDAEEDGGTVS[Phospho (ST)]QEEEDRKPK	46.74	552	573	67526	1357.05	5799.19	4.273	✓
Q9Y365	STARD10	PCTP-like protein	MGGAGGEGSDDDTSLT	783.272	2	M[Oxidation (M)]GGAGGEGS[Phospho (ST)]DDDTSLT	39.96	276	291	33028	127.696	543.112	4.253
P51858	HDGF	Hepatoma-derived growth factor	AGDLLEDSPKRPK	502.585	3	AGDLLEDS[Phospho (ST)]PKRPK	84.74	158	170	26772	7780.26	32778.8	4.213	✓
Q96T37	RBM15	Putative RNA-binding protein 15	SLSPGGAALGYR	614.79	2	SLS[Phospho (ST)]PGGAALGYR	68.04	292	303	107124	325.987	1365.16	4.188	✓
Q8IYB3	SRRM1	Serine/arginine repetitive matrix protein 1	RRTPSPPPR	408.52	3	RRT[Phospho (ST)]PS[Phospho (ST)]PPPR	29.02	579	587	102274	413.198	1728.15	4.182
P35579	MYH9	Myosin-9	KGAGDGSDEEVDGKADGAEAKPAE	1192.01	2	KGAGDGS[Phospho (ST)]DEEVDGKADGAEAKPAE	81.92	1937	1960	226392	1177.26	4900.55	4.163	✓
Q9NYF8	BCLAF1	Bcl-2-associated transcription factor 1	STFREESPLR	651.299	2	STFREES[Phospho (ST)]PLR	29.26	525	534	106059	1307.93	5440.41	4.16	✓
O15127	SCAMP2	Secretory carrier-associated membrane protein 2	AASSAAQGAFQGN	630.255	2	AASS[Phospho (ST)]AAQGAFQGN	75.05	317	329	36625	1498.97	6235.73	4.16
Q13283	G3BP1	Ras GTPase-activating protein-binding protein 1	SSSPAPADIAQTVQEDLR	982.96	2	SSS[Phospho (ST)]PAPADIAQTVQEDLR	139.3	230	247	52132	306.985	1273.95	4.15	✓
Q07955	SFRS1	Splicing factor, arginine/serine-rich 1	VKVDGPRSPSYGR	499.914	3	VKVDGPRS[Phospho (ST)]PSYGR	44	192	204	27728	1676.94	6896.81	4.113	✓
P46937	YAP1	65 kDa Yes-associated protein	GDSETDLEALFNAVMNPK	677.63	3	GDSET[Phospho (ST)]DLEALFNAVMNPK	85.66	59	76	48725	121.542	495.729	4.079	✓
Q9UKJ3	GPATCH8	G patch domain-containing protein 8	GPKPEPPGSGSPAPPR	536.589	3	GPKPEPPGSGS[Phospho (ST)]PAPPR	46.1	730	745	164098	283.596	1153.78	4.068	✓
Q14103	HNRNPD	Heterogeneous nuclear ribonucleoprotein D0	IDASKNEEDEGHSNSSPR	684.604	3	IDASKNEEDEGHSNSS[Phospho (ST)]PR	48.45	68	85	38410	550.823	2238.39	4.064
P46940	IQGAP1	Ras GTPase-activating-like protein IQGAP1	ALQSPALGLR	553.294	2	ALQS[Phospho (ST)]PALGLR	44.43	327	336	189134	215.664	875.149	4.058	✓
P13861	PRKAR2A	cAMP-dependent protein kinase type II-alpha regulatory subunit	VADAKGDSESEEDEDLEVPVPSR	878.357	3	VADAKGDS[Phospho (ST)]ES[Phospho (ST)]EEDEDLEVPVPSR	93.09	71	93	45490	1922.2	7766.13	4.04
P60174	TPI1	Triosephosphate isomerase	KQSLGELIGTLNAAK	541.622	3	KQS[Phospho (ST)]LGELIGTLNAAK	76.34	19	33	26653	509.602	2058.68	4.04	✓
Q8IYB3	SRRM1	Serine/arginine repetitive matrix protein 1	RESPSPAPKPR	434.549	3	RES[Phospho (ST)]PSPAPKPR	41.01	448	458	102274	458.881	1851.97	4.036
O75643	SNRNP200	U5 small nuclear ribonucleoprotein 200 kDa helicase	EEASDDDMEGDEAVVR	931.839	2	EEAS[Phospho (ST)]DDDM[Oxidation (M)]EGDEAVVR	95.81	222	237	244353	98.825	394.307	3.99	✓
Q9H7F0	ATP13A3	Probable cation-transporting ATPase 13A3	LVHDSLEDLQMTR	546.259	3	LVHDS[Phospho (ST)]LEDLQMTR	39.05	813	825	137953	65.335	258.97	3.964	✓
Q9NYF8	BCLAF1	Bcl-2-associated transcription factor 1	RIDISPSTLR	413.21	3	RIDIS[Phospho (ST)]PSTLR	36.94	654	663	106059	324.813	1275.14	3.926	✓
Q8ND56	LSM14A	Protein LSM14 homolog A	SPVSTRPLPSASQK	767.888	2	S[Phospho (ST)]PVSTRPLPSASQK	33.91	216	229	50499	268.032	1050.13	3.918	✓
P29692	EEF1D	Elongation factor 1-delta	KPATPAEDDEDDDIDLFGSDNEEEDKEAAQLR	915.14	4	KPATPAEDDEDDDIDLFGS[Phospho (ST)]DNEEEDKEAAQLR	123.4	144	175	31103	791.885	3100.03	3.915	✓
P51858	HDGF	Hepatoma-derived growth factor	RAGDLLEDSPKRPK	416.216	4	RAGDLLEDS[Phospho (ST)]PKRPK	55.85	157	170	26772	3335.64	13003.1	3.898	✓
Q6UX71	PLXDC2	Plexin domain-containing protein 2	RGSGHPAYAEVEPVGEK	621.61	3	RGS[Phospho (ST)]GHPAYAEVEPVGEK	41.78	504	520	59546	437.438	1694.67	3.874
O94826	TOMM70A	Mitochondrial import receptor subunit TOM70	ASPAPGSGHPEGPGAHLDMNSLDR	817.361	3	AS[Phospho (ST)]PAPGSGHPEGPGAHLDMNSLDR	72.63	90	113	67412	493.974	1909.65	3.866	✓
P35221	CTNNA1	Catenin alpha-1	TPEELDDSDFETEDFDVR	1119.93	2	TPEELDDS[Phospho (ST)]DFETEDFDVR	112.11	634	651	100009	282.433	1091.67	3.865	✓
P98175	RBM10	RNA-binding protein 10	LASDDRPSPPR	430.866	3	LASDDRPS[Phospho (ST)]PPR	31.7	716	726	103469	582.075	2248.77	3.863	✓
Q6UX71	PLXDC2	Plexin domain-containing protein 2	RGSGHPAYAEVEPVGEK	621.62	3	RGS[Phospho (ST)]GHPAYAEVEPVGEK	70.6	504	520	59546	440.57	1697.99	3.854
Q15121	PEA15	Astrocytic phosphoprotein PEA-15	DIIRQPSEEEIIK	550.61	3	DIIRQPS[Phospho (ST)]EEEIIK	30.64	110	122	15031	432.891	1663.06	3.842	✓
Q96T37	RBM15	Putative RNA-binding protein 15	DRTPPLLYR	404.204	3	DRT[Phospho (ST)]PPLLYR	43.24	566	574	107124	186.969	716.934	3.834	✓
O94826	TOMM70A	Mitochondrial import receptor subunit TOM70	ASPAPGSGHPEGPGAHLDMNSLDR	817.359	3	ASPAPGS[Phospho (ST)]GHPEGPGAHLDMNSLDR	80.27	90	113	67412	486.556	1860.26	3.823	✓
P51858	HDGF	Hepatoma-derived growth factor	AGDLLEDSPK	562.75	2	AGDLLEDS[Phospho (ST)]PK	57.82	158	167	26772	1131.3	4316.97	3.816	✓
P29590	PML	Probable transcription factor PML	AVSPPHLDGPPSPR	502.908	3	AVSPPHLDGPPS[Phospho (ST)]PR	56.84	516	529	97489	259.734	988.827	3.807	✓
Q9NR19	ACSS2	Acetyl-coenzyme A synthetase, cytoplasmic	SWSPPPEVSR	611.271	2	SWS[Phospho (ST)]PPPEVSR	45.91	28	37	78529	1301.44	4919.75	3.78
O15173	PGRMC2	Membrane-associated progesterone receptor component 2	LLKPGEEPSEYTDEEDTKDHNKQD	966.42	3	LLKPGEEPSEYT[Phospho (ST)]DEEDTKDHNKQD	52.86	200	223	23804	520.34	1958.13	3.763
Q9UKJ3	GPATCH8	G patch domain-containing protein 8	GPKPEPPGSGSPAPPR	536.595	3	GPKPEPPGSGS[Phospho (ST)]PAPPR	39.85	730	745	164098	304.692	1144.51	3.756	✓
Q13459	MYO9B	Myosin-IXb	VQEKPDSPGGSTQIQR	602.951	3	VQEKPDS[Phospho (ST)]PGGSTQIQR	84.5	1284	1299	243406	344.79	1293.73	3.752	✓
O95466	FMNL1	Formin-like protein 1	RDSELGPGVK	569.267	2	RDS[Phospho (ST)]ELGPGVK	52.24	622	631	121777	1478.86	5536.93	3.744
Q9NR19	ACSS2	Acetyl-coenzyme A synthetase, cytoplasmic	SWSPPPEVSR	611.263	2	SWS[Phospho (ST)]PPPEVSR	57.73	28	37	78529	1336.66	4978.74	3.725
O94979	SEC31A	Protein transport protein Sec31A	AQGEPVAGHESPKIPYEK	504.99	4	AQGEPVAGHES[Phospho (ST)]PKIPYEK	36.85	789	806	132931	740.819	2758.41	3.723	✓
Q1KMD3	HNRNPUL2	Heterogeneous nuclear ribonucleoprotein U-like protein 2	REEDEPEERSGDETPGSEVPGDK	875.356	3	REEDEPEERS[Phospho (ST)]GDETPGSEVPGDK	66.42	152	174	85052	1544.05	5743.93	3.72
P0C7M2	HNRPA1L3	Putative heterogeneous nuclear ribonucleoprotein A1-like protein 3	SESPKEPEQLR	460.547	3	SES[Phospho (ST)]PKEPEQLR	73.28	4	14	34202	10125.8	37631.2	3.716
P07900	HSP90AA1	Heat shock protein HSP 90-alpha	ESEDKPEIEDVGSDEEEEKKDGDK	939.392	3	ESEDKPEIEDVGS[Phospho (ST)]DEEEEKKDGDK	71.18	251	274	84607	278.505	1028.82	3.694	✓
Q8IXT5	RBM12B	RNA-binding protein 12B	RPLEEDFRRSPTEDFR	533.25	4	RPLEEDFRRS[Phospho (ST)]PTEDFR	55.88	629	644	118030	754.333	2782.01	3.688
Q01546	KRT76	Keratin, type II cytoskeletal 2 oral	KQNANLQTAIAEAEQR	622.307	3	KQNANLQT[Phospho (ST)]AIAEAEQR	31.21	420	435	65830	100.642	370.729	3.684
P51858	HDGF	Hepatoma-derived growth factor	AGDLLEDSPKRPK	377.191	4	AGDLLEDS[Phospho (ST)]PKRPK	43.81	158	170	26772	1182.3	4345.65	3.676	✓
Q96T37	RBM15	Putative RNA-binding protein 15	SLSPGGAALGYR	614.798	2	SLS[Phospho (ST)]PGGAALGYR	83.61	292	303	107124	358.362	1303.43	3.637	✓
P29590	PML	Probable transcription factor PML	SSPEQPRPSTSK	460.875	3	SS[Phospho (ST)]PEQPRPSTSK	38.92	504	515	97489	347.166	1259.54	3.628	✓
Q9P1Y6	PHRF1	PHD and RING finger domain-containing protein 1	GAVAAEGASDTEREEPTESQGLAAR	861.384	3	GAVAAEGASDT[Phospho (ST)]EREEPTESQGLAAR	75.6	907	931	178501	114.815	416.271	3.626	✓
P13611	VCAN	Versican core protein	QEIESETTSEEQIQEEK	706.302	3	QEIESETTS[Phospho (ST)]EEQIQEEK	59.4	2108	2124	372590	494.725	1792.16	3.623	✓
Q15477	SKIV2L	Helicase SKI2W	ASSLEDLVLK	577.793	2	ASS[Phospho (ST)]LEDLVLK	71.48	254	263	137712	1184.61	4287.92	3.62
Q6UX71	PLXDC2	Plexin domain-containing protein 2	RGSGHPAYAEVEPVGEK	621.63	3	RGS[Phospho (ST)]GHPAYAEVEPVGEK	40.84	504	520	59546	463.629	1677.61	3.618
O75643	SNRNP200	U5 small nuclear ribonucleoprotein 200 kDa helicase	EEASDDDMEGDEAVVR	923.837	2	EEAS[Phospho (ST)]DDDMEGDEAVVR	115.93	222	237	244353	226.835	820.274	3.616	✓
Q53EL6	PDCD4	Programmed cell death protein 4	SGLTVPTSPK	533.763	2	SGLTVPTS[Phospho (ST)]PK	55.22	87	96	51689	441.169	1594.67	3.615	✓
P62995	TRA2B	Transformer-2 protein homolog beta	RPHTPTPGIYMGRPTYGSSR	582.522	4	RPHT[Phospho (ST)]PTPGIYM[Oxidation (M)]GRPTYGSSR	40.17	198	217	33646	1969.55	7111.3	3.611
Q8IYB3	SRRM1	Serine/arginine repetitive matrix protein 1	EKTPELPEPSVK	478.569	3	EKT[Phospho (ST)]PELPEPSVK	37.08	218	229	102274	955.994	3429.8	3.588
Q32P44	EML3	Echinoderm microtubule-associated protein-like 3	AISSANLLVR	562.299	2	AIS[Phospho (ST)]SANLLVR	59.26	174	183	95138	190.941	678.654	3.554
Q8IYB3	SRRM1	Serine/arginine repetitive matrix protein 1	RQSPSPSTRPIR	487.915	3	RQS[Phospho (ST)]PSPSTRPIR	33.33	711	722	102274	1504.31	5342.03	3.551
Q04759	PRKCQ	Protein kinase C theta type	TNTFCGTPDYIAPEILLGQK	754.362	3	TNT[Phospho (ST)]FCGTPDYIAPEILLGQK	40.77	536	555	81811	367.352	1302.42	3.545	✓
P51858	HDGF	Hepatoma-derived growth factor	RAGDLLEDSPK	640.801	2	RAGDLLEDS[Phospho (ST)]PK	45.75	157	167	26772	745.18	2640.59	3.544	✓
Q9BTU6	PI4K2A	Phosphatidylinositol 4-kinase type 2-alpha	SSSESYTQSFQSR	787.318	2	SSS[Phospho (ST)]ESYTQSFQSR	97.95	460	472	53989	211.915	748.005	3.53	✓
Q9NYF8	BCLAF1	Bcl-2-associated transcription factor 1	STFREESPLR	434.534	3	STFREES[Phospho (ST)]PLR	37.45	525	534	106059	1698.2	5987.68	3.526	✓
P12694	BCKDHA	2-oxoisovalerate dehydrogenase subunit alpha, mitochondrial	IGHHSTSDDSSAYR	538.218	3	IGHHSTS[Phospho (ST)]DDSSAYR	54.57	333	346	50439	732.041	2575.57	3.518
Q9BTU6	PI4K2A	Phosphatidylinositol 4-kinase type 2-alpha	VAAAAGSGPSPPGSPGHDRER	711.638	3	VAAAAGSGPS[Phospho (ST)]PPGS[Phospho (ST)]PGHDRER	43.86	38	58	53989	366.912	1287.98	3.51	✓
P12694	BCKDHA	2-oxoisovalerate dehydrogenase subunit alpha, mitochondrial	IGHHSTSDDSSAYR	538.222	3	IGHHST[Phospho (ST)]SDDSSAYR	65.98	333	346	50439	732.221	2563.86	3.501
Q9NYF8	BCLAF1	Bcl-2-associated transcription factor 1	FNDSEGDDTEETEDYR	1001.35	2	FNDS[Phospho (ST)]EGDDTEETEDYR	63.38	394	409	106059	37.876	132.455	3.497	✓
P27824	CANX	Calnexin	QKSDAEEDGGTVSQEEEDR	730.286	3	QKSDAEEDGGTVS[Phospho (ST)]QEEEDR	50.03	552	570	67526	919.052	3212.42	3.495	✓
Q04759	PRKCQ	Protein kinase C theta type	TNTFCGTPDYIAPEILLGQK	754.37	3	TNTFCGT[Phospho (ST)]PDYIAPEILLGQK	38.19	536	555	81811	372.858	1290.35	3.461	✓
P29692	EEF1D	Elongation factor 1-delta	KPATPAEDDEDDDIDLFGSDNEEEDKEAAQLREER	815.152	5	KPATPAEDDEDDDIDLFGS[Phospho (ST)]DNEEEDKEAAQLREER	126.64	144	178	31103	431.909	1485.67	3.44	✓
Q01518	CAP1	Adenylyl cyclase-associated protein 1	SGPKPFSAPKPQTSPSPK	480.241	4	SGPKPFSAPKPQTS[Phospho (ST)]PSPK	32.84	295	312	51823	1257.36	4317.98	3.434
Q9Y365	STARD10	PCTP-like protein	MGGAGGEGSDDDTSLT	775.274	2	MGGAGGEGS[Phospho (ST)]DDDTSLT	73.34	276	291	33028	155.383	531.936	3.423
O14545	TRAFD1	TRAF-type zinc finger domain-containing protein 1	ALPSLNTGSSSPR	683.832	2	ALPSLNTGSSS[Phospho (ST)]PR	63.69	317	329	64800	534.525	1823.68	3.412
P12694	BCKDHA	2-oxoisovalerate dehydrogenase subunit alpha, mitochondrial	IGHHSTSDDSSAYR	538.216	3	IGHHST[Phospho (ST)]SDDSSAYR	72.4	333	346	50439	762.968	2589.62	3.394
O14545	TRAFD1	TRAF-type zinc finger domain-containing protein 1	ALPSLNTGSSSPR	683.821	2	ALPSLNTGSSS[Phospho (ST)]PR	59.31	317	329	64800	539.302	1828.28	3.39
O15173	PGRMC2	Membrane-associated progesterone receptor component 2	LLKPGEEPSEYTDEEDTKDHNKQD	966.406	3	LLKPGEEPSEYT[Phospho (ST)]DEEDTKDHNKQD	38.02	200	223	23804	526.451	1780.43	3.382
Q1KMD3	HNRNPUL2	Heterogeneous nuclear ribonucleoprotein U-like protein 2	REEDEPEERSGDETPGSEVPGDK	656.772	4	REEDEPEERS[Phospho (ST)]GDETPGSEVPGDK	94.73	152	174	85052	2245.91	7568.26	3.37
Q04759	PRKCQ	Protein kinase C theta type	TNTFCGTPDYIAPEILLGQK	754.359	3	TNTFCGT[Phospho (ST)]PDYIAPEILLGQK	44.6	536	555	81811	380.611	1281.75	3.368	✓
P35221	CTNNA1	Catenin alpha-1	TPEELDDSDFETEDFDVR	746.959	3	TPEELDDS[Phospho (ST)]DFETEDFDVR	74.47	634	651	100009	1495.41	5023.05	3.359	✓
Q9BSJ8	FAM62A	Extended synaptotagmin-1	TLSPEFNER	586.756	2	TLS[Phospho (ST)]PEFNER	44.23	1032	1040	122780	177.862	596.576	3.354	✓
Q15642	TRIP10	Cdc42-interacting protein 4	APSDSSLGTPSDGRPELR	641.3	3	APS[Phospho (ST)]DSSLGTPSDGRPELR	70.72	294	311	68310	898.895	3010.68	3.349
O94979	SEC31A	Protein transport protein Sec31A	AQGEPVAGHESPKIPYEK	672.986	3	AQGEPVAGHES[Phospho (ST)]PKIPYEK	46.52	789	806	132931	1150.16	3752.23	3.262	✓
P07814	EPRS	Bifunctional aminoacyl-tRNA synthetase	EYIPGQPPLSQSSDSSPTR	709.317	3	EYIPGQPPLSQSSDSS[Phospho (ST)]PTR	49.14	871	889	170497	390.844	1263.9	3.234
Q9H7F0	ATP13A3	Probable cation-transporting ATPase 13A3	LVHDSLEDLQMTR	546.248	3	LVHDS[Phospho (ST)]LEDLQMTR	37.21	813	825	137953	92.567	298.706	3.227	✓
Q15149	PLEC1	Plectin-1	SSSVGSSSSYPISPAVSR	638.935	3	SSS[Phospho (ST)]VGS[Phospho (ST)]SSSYPISPAVSR	30.67	4384	4401	531466	254.191	819.321	3.223	✓
Q09666	AHNAK	Neuroblast differentiation-associated protein AHNAK	LKSEDGVEGDLGETQSR	950.427	2	LKS[Phospho (ST)]EDGVEGDLGETQSR	51.38	133	149	628699	72.557	233.479	3.218	✓
Q1KMD3	HNRNPUL2	Heterogeneous nuclear ribonucleoprotein U-like protein 2	EEDEPEERSGDETPGSEVPGDK	823.325	3	EEDEPEERS[Phospho (ST)]GDETPGSEVPGDK	31.75	153	174	85052	1237.46	3972.49	3.21
Q9UQ35	SRRM2	Serine/arginine repetitive matrix protein 2	TSPPLLDR	489.737	2	T[Phospho (ST)]SPPLLDR	30.41	2397	2404	299438	1883.12	6040.74	3.208	✓
O60716	CTNND1	Catenin delta-1	VGGSSVDLHR	553.751	2	VGGSS[Phospho (ST)]VDLHR	38.87	265	274	108103	213.148	682.915	3.204	✓
Q9UQ35	SRRM2	Serine/arginine repetitive matrix protein 2	TSPPLLDR	489.739	2	TS[Phospho (ST)]PPLLDR	44.59	2397	2404	299438	1886.35	6030.09	3.197	✓
Q1KMD3	HNRNPUL2	Heterogeneous nuclear ribonucleoprotein U-like protein 2	REEDEPEERSGDETPGSEVPGDK	902.024	3	REEDEPEERS[Phospho (ST)]GDETPGS[Phospho (ST)]EVPGDK	29.17	152	174	85052	56.443	180.309	3.195
P23396	RPS3	40S ribosomal protein S3	DEILPTTPISEQK	775.874	2	DEILPT[Phospho (ST)]TPISEQK	31.4	215	227	26671	586.797	1852	3.156	✓
P08670	VIM	Vimentin	SLYASSPGGVYATR	754.847	2	SLYASS[Phospho (ST)]PGGVYATR	91.72	51	64	53619	293.223	913.677	3.116	✓
Q9BTU6	PI4K2A	Phosphatidylinositol 4-kinase type 2-alpha	SSSESYTQSFQSR	787.322	2	SS[Phospho (ST)]SESYTQSFQSR	63.22	460	472	53989	234.76	731.029	3.114	✓
Q9NYF8	BCLAF1	Bcl-2-associated transcription factor 1	KAEGEPQEESPLKSK	579.61	3	KAEGEPQEES[Phospho (ST)]PLKSK	63.94	168	182	106059	1288.53	3949.95	3.065	✓
O00264	PGRMC1	Membrane-associated progesterone receptor component 1	EGEEPTVYSDEEEPKDESAR	1188.47	2	EGEEPTVYS[Phospho (ST)]DEEEPKDESAR	42.43	173	192	21658	331.367	1010.7	3.05
P08670	VIM	Vimentin	LRSSVPGVR	525.779	2	LRSS[Phospho (ST)]VPGVR	36.99	70	78	53619	6046.98	18427.9	3.047	✓
O60271	SPAG9	C-jun-amino-terminal kinase-interacting protein 4	SASQSSLDKLDQELK	576.939	3	SASQSS[Phospho (ST)]LDKLDQELK	44.9	728	742	146115	112.943	341.792	3.026	✓
Q7Z3K3	POGZ	Pogo transposable element with ZNF domain	SLDSEPSVPSAAKPPSPEK	668.322	3	SLDSEPSVPSAAKPPS[Phospho (ST)]PEK	33.26	410	428	155245	120.284	363.865	3.025	✓
P08670	VIM	Vimentin	LRSSVPGVR	525.777	2	LRS[Phospho (ST)]SVPGVR	33.63	70	78	53619	6083.14	18346.8	3.016	✓
P35579	MYH9	Myosin-9	KGAGDGSDEEVDGKADGAEAKPAE	795.01	3	KGAGDGS[Phospho (ST)]DEEVDGKADGAEAKPAE	95.96	1937	1960	226392	3189.92	9605.97	3.011	✓
P35659	DEK	Protein DEK	EESEEEEDEDDEEEEEEEKEK	908.312	3	EES[Phospho (ST)]EEEEDEDDEEEEEEEKEK	39.44	30	50	42648	64.251	193.096	3.005	✓
Q96TC7	FAM82A2	Regulator of microtubule dynamics protein 3	SQSLPNSLDYTQTSDPGR	682.636	3	SQSLPNS[Phospho (ST)]LDYTQTSDPGR	89.42	44	61	52086	1149.62	3454.96	3.005
P00797	REN	Renin	RMPSIR	420.206	2	RMPS[Phospho (ST)]IR	34.35	38	43	45028	2335.7	7012.61	3.002
Q00587	CDC42EP1	Cdc42 effector protein 1	RSDSLLSFR	580.781	2	RSDS[Phospho (ST)]LLSFR	33.75	189	197	40270	252.384	752.807	2.983	✓
Q9Y2H5	PLEKHA6	Pleckstrin homology domain-containing family A member 6	RSFPPR	420.2	2	RS[Phospho (ST)]FPPR	31.91	297	302	117056	2304.55	6871.73	2.982	✓
Q9UQ35	SRRM2	Serine/arginine repetitive matrix protein 2	ELSNSPLR	498.226	2	ELSNS[Phospho (ST)]PLR	40.87	1316	1323	299438	637.807	1897.31	2.975	✓
Q01130	SFRS2	Splicing factor, arginine/serine-rich 2	VDNLTYRTSPDTLR	577.608	3	VDNLTYRTS[Phospho (ST)]PDTLR	36.68	18	31	25461	287.906	847.695	2.944	✓
P51858	HDGF	Hepatoma-derived growth factor	KGNAEGSSDEEGKLVIDEPAK	778.327	3	KGNAEGS[Phospho (ST)]S[Phospho (ST)]DEEGKLVIDEPAK	84.28	126	146	26772	261.141	767.217	2.938	✓
P07900	HSP90AA1	Heat shock protein HSP 90-alpha	ESEDKPEIEDVGSDEEEEKK	800.997	3	ESEDKPEIEDVGS[Phospho (ST)]DEEEEKK	76.64	251	270	84607	861.459	2522.54	2.928	✓
P35579	MYH9	Myosin-9	GAGDGSDEEVDGKADGAEAKPAE	1127.96	2	GAGDGS[Phospho (ST)]DEEVDGKADGAEAKPAE	73.54	1938	1960	226392	107.918	315.83	2.927	✓
Q9Y2W1	THRAP3	Thyroid hormone receptor-associated protein 3	RIDISPSTFR	636.311	2	RIDIS[Phospho (ST)]PSTFR	49.83	678	687	108601	2228.77	6511.16	2.921
Q96I25	RBM17	Splicing factor 45	RPDPDSDEDEDYERER	701.604	3	RPDPDS[Phospho (ST)]DEDEDYERER	30.1	150	165	44934	279.255	814.051	2.915
Q9H019	FAM54B	Protein FAM54B	NASVPNLR	475.729	2	NAS[Phospho (ST)]VPNLR	30.14	101	108	31937	106.168	307.288	2.894
P38159	RBMX	Heterogeneous nuclear ribonucleoprotein G	DVYLSPR	465.21	2	DVYLS[Phospho (ST)]PR	30.44	204	210	42306	707.046	2036.54	2.88	✓
Q13501	SQSTM1	Sequestosome-1	LTPVSPESSSTEEK	785.854	2	LTPVS[Phospho (ST)]PESSSTEEK	52.59	268	281	47657	351.378	1008.67	2.871	✓
Q8IYB3	SRRM1	Serine/arginine repetitive matrix protein 1	RRTPTPPPR	413.194	3	RRT[Phospho (ST)]PT[Phospho (ST)]PPPR	30.35	570	578	102274	615.949	1768.15	2.871
Q9UQ35	SRRM2	Serine/arginine repetitive matrix protein 2	ELSNSPLR	498.235	2	ELSNS[Phospho (ST)]PLR	33.92	1316	1323	299438	690.83	1981.36	2.868	✓
Q3YEC7	PARF	Putative GTP-binding protein Parf	RSIISR	406.211	2	RSIIS[Phospho (ST)]R	31.24	355	360	79500	560.09	1606.04	2.867	✓
O00264	PGRMC1	Membrane-associated progesterone receptor component 1	EGEEPTVYSDEEEPKDESAR	1188.48	2	EGEEPTVYS[Phospho (ST)]DEEEPKDESAR	82.53	173	192	21658	344.431	978.128	2.84
P07900	HSP90AA1	Heat shock protein HSP 90-alpha	ESEDKPEIEDVGSDEEEEKK	601.004	4	ES[Phospho (ST)]EDKPEIEDVGSDEEEEKK	39.17	251	270	84607	786.22	2223.96	2.829	✓
Q99523	SORT1	Sortilin	SGYHDDSDEDLLE	787.782	2	SGYHDDS[Phospho (ST)]DEDLLE	43.51	819	831	92009	302.331	852.663	2.82	✓
Q8WX93	PALLD	Palladin	SRSRDSGDENEPIQER	705.595	3	S[Phospho (ST)]RS[Phospho (ST)]RDS[Phospho (ST)]GDENEPIQER	99.83	1116	1131	150443	870.441	2448.84	2.813	✓
Q14643	ITPR1	Inositol 1,4,5-trisphosphate receptor type 1	RDSVLAASR	527.755	2	RDS[Phospho (ST)]VLAASR	45.78	1596	1604	313745	431.843	1210.52	2.803	✓
P25788	PSMA3	Proteasome subunit alpha type-3	ESLKEEDESDDDNM	868.294	2	ESLKEEDES[Phospho (ST)]DDDNM	69.17	242	255	28415	1948.91	5460.55	2.802
P07900	HSP90AA1	Heat shock protein HSP 90-alpha	ESEDKPEIEDVGSDEEEEKK	601.003	4	ESEDKPEIEDVGS[Phospho (ST)]DEEEEKK	55.35	251	270	84607	786.85	2201.75	2.798	✓
Q13501	SQSTM1	Sequestosome-1	LTPVSPESSSTEEK	785.846	2	LTPVS[Phospho (ST)]PESSSTEEK	68.87	268	281	47657	347.516	971.519	2.796	✓
Q9NYF8	BCLAF1	Bcl-2-associated transcription factor 1	RIDISPSTLR	413.215	3	RIDIS[Phospho (ST)]PSTLR	39.97	654	663	106059	507.214	1417.81	2.795	✓
P29692	EEF1D	Elongation factor 1-delta	KPATPAEDDEDDDIDLFGSDNEEEDKEAAQLREER	1018.7	4	KPATPAEDDEDDDIDLFGS[Phospho (ST)]DNEEEDKEAAQLREER	112.75	144	178	31103	614.645	1716.41	2.793	✓
Q8NC51	SERBP1	Plasminogen activator inhibitor 1 RNA-binding protein	SKSEEAHAEDSVMDHHFR	552.725	4	SKS[Phospho (ST)]EEAHAEDSVM[Oxidation (M)]DHHFR	31.71	328	345	44938	318.959	890.122	2.791	✓
Q8IYB3	SRRM1	Serine/arginine repetitive matrix protein 1	KETESEAEDNLDDLEK	972.911	2	KETES[Phospho (ST)]EAEDNLDDLEK	111.09	870	885	102274	46.82	130.651	2.79
Q9NWB6	ARGLU1	Arginine and glutamate-rich protein 1	ASSPPDRIDIFGR	504.242	3	ASS[Phospho (ST)]PPDRIDIFGR	50.42	75	87	33197	249.462	691.82	2.773
Q9HBL0	TNS1	Tensin-1	AASDGQYENQSPEATSPR	689.924	3	AASDGQY[Phospho (Y)]ENQS[Phospho (ST)]PEATSPR	49.56	897	914	185586	230.036	637.948	2.773	✓
Q9Y2W1	THRAP3	Thyroid hormone receptor-associated protein 3	IDISPSTFR	558.265	2	IDIS[Phospho (ST)]PSTFR	58.71	679	687	108601	3930.2	10875.3	2.767
P46940	IQGAP1	Ras GTPase-activating-like protein IQGAP1	ALQSPALGLR	553.288	2	ALQS[Phospho (ST)]PALGLR	49.71	327	336	189134	309.015	854.015	2.764	✓
Q01518	CAP1	Adenylyl cyclase-associated protein 1	SGPKPFSAPKPQTSPSPK	639.986	3	SGPKPFSAPKPQT[Phospho (ST)]SPSPK	40.75	295	312	51823	3668.6	10136.9	2.763
P07900	HSP90AA1	Heat shock protein HSP 90-alpha	ESEDKPEIEDVGSDEEEEKKDGDK	704.792	4	ESEDKPEIEDVGS[Phospho (ST)]DEEEEKKDGDK	87.02	251	274	84607	3217.3	8879.85	2.76	✓
Q9H3Z4	DNAJC5	DnaJ homolog subfamily C member 5	SLSTSGESLYHVLGLDK	943.453	2	S[Phospho (ST)]LSTSGESLYHVLGLDK	77.81	8	24	22134	1433.61	3954.61	2.758
Q9H3Z4	DNAJC5	DnaJ homolog subfamily C member 5	SLSTSGESLYHVLGLDK	943.453	2	SLS[Phospho (ST)]TSGESLYHVLGLDK	119.62	8	24	22134	1437.04	3952.27	2.75
P55327	TPD52	Tumor protein D52	NSPTFKSFEEK	697.309	2	NSPTFKS[Phospho (ST)]FEEK	34.8	170	180	24312	147.341	404.58	2.746	✓
Q86VZ1	P2RY8	P2Y purinoceptor 8	RESLFSAR	523.249	2	RES[Phospho (ST)]LFSAR	33.73	322	329	40608	263.116	721.685	2.743	✓
Q9BX95	SGPP1	Sphingosine-1-phosphate phosphatase 1	RNSLTGEEGQLAR	755.852	2	RNS[Phospho (ST)]LTGEEGQLAR	60.82	110	122	49076	395.632	1082.52	2.736
P27824	CANX	Calnexin	QKSDAEEDGGTVSQEEEDR	730.289	3	QKS[Phospho (ST)]DAEEDGGTVSQEEEDR	89.89	552	570	67526	1232.68	3361.57	2.727	✓
Q13557	CAMK2D	Calcium/calmodulin-dependent protein kinase type II delta chain	ESTESSNTTIEDEDVKAR	697.637	3	ESTESSNTT[Phospho (ST)]IEDEDVKAR	47.27	329	346	56334	66.765	181.027	2.711
Q8WWA1	TMEM40	Transmembrane protein 40	RRGSDPASGEVEASQLR	632.285	3	RRGS[Phospho (ST)]DPASGEVEASQLR	45.15	134	150	25479	1091.82	2957.21	2.709
Q9NQC3	RTN4	Reticulon-4	RGSSGSVDETLFALPAASEPVIR	813.734	3	RGSSGS[Phospho (ST)]VDETLFALPAASEPVIR	60.38	179	201	129851	172.922	466.769	2.699	✓
Q9NYF8	BCLAF1	Bcl-2-associated transcription factor 1	RIDISPSTLR	619.319	2	RIDIS[Phospho (ST)]PSTLR	45.64	654	663	106059	2701.99	7277.78	2.693	✓
P07900	HSP90AA1	Heat shock protein HSP 90-alpha	ESEDKPEIEDVGSDEEEEKKDGDK	704.794	4	ES[Phospho (ST)]EDKPEIEDVGSDEEEEKKDGDK	57.43	251	274	84607	3334.52	8965.28	2.689	✓
Q5T1M5	FKBP15	FK506-binding protein 15	RPSQEQSASASSGQPQAPLNR	759.355	3	RPS[Phospho (ST)]QEQSASASSGQPQAPLNR	110.76	954	974	133547	2563.36	6878.7	2.683	✓
Q9P1Y6	PHRF1	PHD and RING finger domain-containing protein 1	EASPAPLAQGEPGREDLPTR	724.344	3	EAS[Phospho (ST)]PAPLAQGEPGREDLPTR	49.67	1200	1219	178501	342.956	919.422	2.681	✓
Q15642	TRIP10	Cdc42-interacting protein 4	APSDSSLGTPSDGRPELR	641.291	3	APS[Phospho (ST)]DSSLGTPSDGRPELR	54.02	294	311	68310	1148.11	3077.33	2.68
Q8IYB3	SRRM1	Serine/arginine repetitive matrix protein 1	VPKPEPIPEPKEPSPEK	660.002	3	VPKPEPIPEPKEPS[Phospho (ST)]PEK	51.19	247	263	102274	1335.37	3575.94	2.678
Q9UPU7	TBC1D2B	TBC1 domain family member 2B	ERDTSPDKGELVSDEEEDT	744.299	3	ERDTSPDKGELVS[Phospho (ST)]DEEEDT	79.24	945	963	109812	113.696	300.6	2.644	✓
Q04637	EIF4G1	Eukaryotic translation initiation factor 4 gamma 1	SFSKEVEER	595.759	2	SFS[Phospho (ST)]KEVEER	54.93	1186	1194	175426	367.99	968.949	2.633	✓
Q15149	PLEC1	Plectin-1	SDEGQLSPATR	620.763	2	SDEGQLS[Phospho (ST)]PATR	43.82	714	724	531466	923.3	2419.5	2.62	✓
O75569	PRKRA	Interferon-inducible double stranded RNA-dependent protein kinase activator A	AEAPPLEREDSGTFSLGK	992.465	2	AEAPPLEREDS[Phospho (ST)]GTFSLGK	61.68	8	25	34383	85.307	222.686	2.61	✓
Q96TC7	FAM82A2	Regulator of microtubule dynamics protein 3	SQSLPNSLDYTQTSDPGR	682.634	3	SQS[Phospho (ST)]LPNSLDYTQTSDPGR	82.22	44	61	52086	1173.83	3063.07	2.609
Q9NQC3	RTN4	Reticulon-4	RGSSGSVDETLFALPAASEPVIR	813.742	3	RGS[Phospho (ST)]SGSVDETLFALPAASEPVIR	67.09	179	201	129851	174.702	454.769	2.603	✓
Q86UP2	KTN1	Kinectin	EIQNGNLHESDSESVPR	664.29	3	EIQNGNLHES[Phospho (ST)]DSESVPR	59.54	66	82	156179	201.596	522.56	2.592	✓
Q96TC7	FAM82A2	Regulator of microtubule dynamics protein 3	SQSLPNSLDYTQTSDPGR	1023.45	2	SQS[Phospho (ST)]LPNSLDYTQTSDPGR	84.66	44	61	52086	432.108	1115.96	2.583
Q9NYF8	BCLAF1	Bcl-2-associated transcription factor 1	YSPSQNSPIHHIPSR	627.268	3	YS[Phospho (ST)]PS[Phospho (ST)]QNSPIHHIPSR	31.3	284	298	106059	862.02	2223.31	2.579	✓
Q12996	CSTF3	Cleavage stimulation factor 77 kDa subunit	RPNEDSDEDEEKGAVVPPVHDIYR	712.326	4	RPNEDS[Phospho (ST)]DEDEEKGAVVPPVHDIYR	81.14	686	709	82869	561.353	1442.9	2.57	✓
Q5T200	ZC3H13	Zinc finger CCCH domain-containing protein 13	SLSPSHLTEDR	661.294	2	SLS[Phospho (ST)]PSHLTEDR	45.36	875	885	196519	321.369	820.957	2.555	✓
P25788	PSMA3	Proteasome subunit alpha type-3	ESLKEEDESDDDNM	868.3	2	ES[Phospho (ST)]LKEEDESDDDNM	56.23	242	255	28415	2776.77	7083.13	2.551
P27824	CANX	Calnexin	QKSDAEEDGGTVSQEEEDR	730.294	3	QKSDAEEDGGTVS[Phospho (ST)]QEEEDR	53.33	552	570	67526	1254.91	3190.59	2.542	✓
P36915	GNL1	Guanine nucleotide-binding protein-like 1	REEQTDTSDGESVTHHIR	726.313	3	REEQTDTS[Phospho (ST)]DGESVTHHIR	36.24	44	61	68619	136.352	345.035	2.53
Q9H7L9	SUDS3	Sin3 histone deacetylase corepressor complex component SDS3	RPASPSSPEHLPATPAESPAQR	815.031	3	RPAS[Phospho (ST)]PSS[Phospho (ST)]PEHLPATPAESPAQR	45.24	231	252	38112	229.841	574.868	2.501
Q6JBY9	RCSD1	Capz-interacting protein	APGSPLSSEGAAGEGVR	541.244	3	APGSPLSS[Phospho (ST)]EGAAGEGVR	39.29	213	229	44477	415.629	1034.18	2.488	✓
O95772	STARD3NL	MLN64 N-terminal domain homolog	LLIVQDASER	612.302	2	LLIVQDAS[Phospho (ST)]ER	44.16	186	195	26638	374.75	931.613	2.486	✓
Q5T200	ZC3H13	Zinc finger CCCH domain-containing protein 13	SLSPSHLTEDR	661.294	2	SLSPS[Phospho (ST)]HLTEDR	34.27	875	885	196519	341.493	833.702	2.441	✓
P43243	MATR3	Matrin-3	RDSFDDRGPSLNPVLDYDHGSR	866.723	3	RDSFDDRGPS[Phospho (ST)]LNPVLDYDHGSR	36.57	186	207	94565	256.754	623.806	2.43	✓
Q9UBC2	EPS15L1	Epidermal growth factor receptor substrate 15-like 1	STPSHGSVSSLNSTGSLSPK	670.644	3	STPSHGSVSSLNSTGSLS[Phospho (ST)]PK	54.38	238	257	94197	293.573	712.297	2.426
P13796	LCP1	Plastin-2	GSVSDEEMMELR	739.787	2	GS[Phospho (ST)]VSDEEM[Oxidation (M)]MELR	67.57	4	15	70245	168.548	408.838	2.426	✓
P27824	CANX	Calnexin	QKSDAEEDGGTVSQEEEDR	730.281	3	QKS[Phospho (ST)]DAEEDGGTVSQEEEDR	74.56	552	570	67526	1277.44	3098.11	2.425	✓
Q8IYB3	SRRM1	Serine/arginine repetitive matrix protein 1	KETESEAEDNLDDLEK	648.936	3	KETES[Phospho (ST)]EAEDNLDDLEK	78.05	870	885	102274	497.108	1204.56	2.423
Q7Z4V5	HDGFRP2	Hepatoma-derived growth factor-related protein 2	GESAEDKEHEEGRDSEEGPR	581.485	4	GESAEDKEHEEGRDS[Phospho (ST)]EEGPR	28.81	611	630	74272	152.834	369.957	2.421	✓
O94979	SEC31A	Protein transport protein Sec31A	EQTLSPTITSGLHNIAR	639.985	3	EQTLS[Phospho (ST)]PTITSGLHNIAR	75.55	1159	1175	132931	239.737	579.395	2.417	✓
P43243	MATR3	Matrin-3	RDSFDDRGPSLNPVLDYDHGSR	866.719	3	RDS[Phospho (ST)]FDDRGPSLNPVLDYDHGSR	67.68	186	207	94565	261.038	628.57	2.408	✓
Q14195	DPYSL3	Dihydropyrimidinase-related protein 3	GSPTRPNPPVR	629.312	2	GS[Phospho (ST)]PTRPNPPVR	38.38	521	531	61924	13074.3	31422.3	2.403
Q9P2K5	MYEF2	Myelin expression factor 2	AEVPGATGGDSPHLQPAEPPGEPR	816.04	3	AEVPGAT[Phospho (ST)]GGDSPHLQPAEPPGEPR	74.72	7	30	64139	497.601	1195.31	2.402	✓
P62995	TRA2B	Transformer-2 protein homolog beta	RPHTPTPGIYMGRPTYGSSR	578.526	4	RPHT[Phospho (ST)]PTPGIYMGRPTYGSSR	40.86	198	217	33646	808.845	1935.82	2.393
Q9H7L9	SUDS3	Sin3 histone deacetylase corepressor complex component SDS3	RPASPSSPEHLPATPAESPAQR	815.033	3	RPASPS[Phospho (ST)]S[Phospho (ST)]PEHLPATPAESPAQR	31.79	231	252	38112	237.753	567.971	2.389
Q8TAQ2	SMARCC2	SWI/SNF complex subunit SMARCC2	TLTDEVNSPDSDRR	562.243	3	TLTDEVNS[Phospho (ST)]PDSDRR	31.76	276	289	132797	670.018	1590.87	2.374	✓
P29692	EEF1D	Elongation factor 1-delta	KPATPAEDDEDDDIDLFGSDNEEEDKEAAQLREER	1018.69	4	KPATPAEDDEDDDIDLFGS[Phospho (ST)]DNEEEDKEAAQLREER	123.76	144	178	31103	572.077	1355.11	2.369	✓
P43243	MATR3	Matrin-3	RDSFDDRGPSLNPVLDYDHGSR	866.71	3	RDS[Phospho (ST)]FDDRGPSLNPVLDYDHGSR	74.91	186	207	94565	261.825	620.264	2.369	✓
Q8IYB3	SRRM1	Serine/arginine repetitive matrix protein 1	KEKTPELPEPSVK	521.27	3	KEKT[Phospho (ST)]PELPEPSVK	41.95	217	229	102274	829.509	1959.31	2.362
Q9NYF8	BCLAF1	Bcl-2-associated transcription factor 1	YSPSQNSPIHHIPSR	627.267	3	Y[Phospho (Y)]SPSQNS[Phospho (ST)]PIHHIPSR	31.06	284	298	106059	858.266	2021.82	2.356	✓
P27708	CAD	CAD protein	IHRASDPGLPAEEPK	566.27	3	IHRAS[Phospho (ST)]DPGLPAEEPK	39.16	1855	1869	242829	663.088	1561.93	2.356	✓
Q9Y478	PRKAB1	5'-AMP-activated protein kinase subunit beta-1	SHNNFVAILDLPEGEHQYK	764.35	3	S[Phospho (ST)]HNNFVAILDLPEGEHQYK	59.84	108	126	30363	236.521	556.743	2.354
P18754	RCC1	Regulator of chromosome condensation	SPPADAIPK	488.232	2	S[Phospho (ST)]PPADAIPK	31.48	11	19	44941	786.162	1839.69	2.34	✓
Q8IYB3	SRRM1	Serine/arginine repetitive matrix protein 1	EKTPELPEPSVK	717.354	2	EKT[Phospho (ST)]PELPEPSVK	28.54	218	229	102274	797.659	1866.41	2.34
P05114	HMGN1	Non-histone chromosomal protein HMG-14	KVSSAEGAAKEEPK	504.242	3	KVSS[Phospho (ST)]AEGAAKEEPK	37.87	5	18	10653	414.891	966.936	2.331
Q8IZ21	PHACTR4	Phosphatase and actin regulator 4	SSSPVQVEEEPVR	761.857	2	SSS[Phospho (ST)]PVQVEEEPVR	78.45	116	128	78163	147.398	342.562	2.324	✓
Q14498	RBM39	RNA-binding protein 39	DKSPVREPIDNLTPEER	692.334	3	DKS[Phospho (ST)]PVREPIDNLTPEER	87.88	134	150	59343	1906.88	4419.18	2.317	✓
Q14764	MVP	Major vault protein	SLQPLAPR	481.24	2	S[Phospho (ST)]LQPLAPR	33.98	445	452	99266	421.314	974.101	2.312	✓
Q96BI3	APH1A	Gamma-secretase subunit APH-1A	SPISIR	376.693	2	SPIS[Phospho (ST)]IR	28.72	110	115	28977	254.014	583.284	2.296	✓
Q9H0B6	KLC2	Kinesin light chain 2	ASSLNFLNK	537.256	2	ASS[Phospho (ST)]LNFLNK	68.64	580	588	68892	247.179	567.017	2.294	✓
Q92614	MYO18A	Myosin-XVIIIa	SLAPDRSDDEHDPLDNTSRPR	619.023	4	SLAPDRS[Phospho (ST)]DDEHDPLDNTSRPR	38.05	2014	2034	232971	673.047	1539.67	2.288
O60832	DKC1	H/ACA ribonucleoprotein complex subunit 4	AKEVELVSE	542.25	2	AKEVELVS[Phospho (ST)]E	49.95	506	514	57638	597.286	1364.99	2.285	✓
Q14195	DPYSL3	Dihydropyrimidinase-related protein 3	GSPTRPNPPVR	419.877	3	GS[Phospho (ST)]PTRPNPPVR	46	521	531	61924	21677.1	49421.8	2.28
P08670	VIM	Vimentin	LRSSVPGVR	350.854	3	LRSS[Phospho (ST)]VPGVR	38.52	70	78	53619	2392.85	5454.56	2.28	✓
Q9HBL0	TNS1	Tensin-1	SQSVPGAWPGASPLSSQPLSGSSR	807.381	3	SQS[Phospho (ST)]VPGAWPGASPLSSQPLSGSSR	105.47	731	754	185586	390.929	890.22	2.277	✓
P35749	MYH11	Myosin-11	RVIENADGSEEETDTR	950.913	2	RVIENADGS[Phospho (ST)]EEETDTR	53.91	1946	1961	227199	230.593	524.774	2.276	✓
Q9UNE7	STUB1	STIP1 homology and U box-containing protein 1	LGAGGGSPEKSPSAQELK	598.284	3	LGAGGGS[Phospho (ST)]PEKSPSAQELK	46.2	13	30	34834	700.321	1594.05	2.276
P33241	LSP1	Lymphocyte-specific protein 1	QASIELPSMAVASTK	538.261	3	QAS[Phospho (ST)]IELPSMAVASTK	58.17	250	264	37169	135.641	308.611	2.275	✓
Q6NZI2	PTRF	Polymerase I and transcript release factor	VMIYQDEVKLPAKLSISK	536.288	4	VMIYQDEVKLPAKLSIS[Phospho (ST)]K	53.14	153	170	43450	824.9	1862.18	2.257	✓
Q5T200	ZC3H13	Zinc finger CCCH domain-containing protein 13	SLSPSHLTEDR	661.284	2	S[Phospho (ST)]LSPSHLTEDR	28.16	875	885	196519	371.189	834.696	2.249	✓
P08670	VIM	Vimentin	ISLPLPNFSSLNLR	550.959	3	ISLPLPNFS[Phospho (ST)]SLNLR	69.6	411	424	53619	322.45	723.112	2.243	✓
Q9UPU7	TBC1D2B	TBC1 domain family member 2B	DTSPDKGELVSDEEEDT	973.377	2	DTSPDKGELVS[Phospho (ST)]DEEEDT	61.49	947	963	109812	272.584	608.891	2.234	✓
O15173	PGRMC2	Membrane-associated progesterone receptor component 2	LLKPGEEPSEYTDEEDTKDHNK	664.291	4	LLKPGEEPSEYT[Phospho (ST)]DEEDTKDHNK	36.78	200	221	23804	304.28	679.048	2.232
Q16643	DBN1	Drebrin	LSSPVLHR	494.756	2	LSS[Phospho (ST)]PVLHR	53.01	140	147	71385	1511.77	3368.23	2.228	✓
Q92466	DDB2	DNA damage-binding protein 2	SRSPLELEPEAK	718.343	2	SRS[Phospho (ST)]PLELEPEAK	42.42	24	35	47833	284.984	632.093	2.218	✓
Q8IYB3	SRRM1	Serine/arginine repetitive matrix protein 1	RYSPPIQR	366.183	3	RYS[Phospho (ST)]PPIQR	38.7	595	602	102274	1141.05	2529.43	2.217
Q8NC51	SERBP1	Plasminogen activator inhibitor 1 RNA-binding protein	SKSEEAHAEDSVMDHHFR	548.728	4	SKS[Phospho (ST)]EEAHAEDSVMDHHFR	70.83	328	345	44938	399.192	882.293	2.21	✓
Q9BUH6	C9orf142	Uncharacterized protein C9orf142	LAAAEETAVSPR	647.807	2	LAAAEETAVS[Phospho (ST)]PR	65.65	139	150	21626	198.526	438.001	2.206
Q7Z5R6	APBB1IP	Amyloid beta A4 precursor protein-binding family B member 1-interacting protein	SSDTSGSPATPLK	664.292	2	SS[Phospho (ST)]DTSGSPATPLK	28.16	525	537	73137	247.186	543.148	2.197	✓
Q8TAQ2	SMARCC2	SWI/SNF complex subunit SMARCC2	KRSPSPSPTPEAK	514.565	3	KRS[Phospho (ST)]PS[Phospho (ST)]PSPTPEAK	29.52	300	312	132797	191.118	418.373	2.189	✓
Q9H3N1	TMX1	Thioredoxin-related transmembrane protein 1	KVEEEQEADEEDVSEEEAESK	839.998	3	KVEEEQEADEEDVS[Phospho (ST)]EEEAESK	109.95	234	254	31771	1134.95	2478.29	2.184
Q69YN4	KIAA1429	Protein virilizer homolog	SFLSEPSSPGR	622.271	2	SFLSEPSS[Phospho (ST)]PGR	32.73	1572	1582	201898	899.754	1961.62	2.18	✓
Q9UMS6	SYNPO2	Synaptopodin-2	SKSPDPDPNLSHDR	548.904	3	SKS[Phospho (ST)]PDPDPNLSHDR	61.76	224	237	117441	705.153	1534.9	2.177	✓
Q9BX95	SGPP1	Sphingosine-1-phosphate phosphatase 1	RNSLTGEEGQLAR	504.238	3	RNSLT[Phospho (ST)]GEEGQLAR	65.99	110	122	49076	1276.39	2772.29	2.172
Q9Y2W1	THRAP3	Thyroid hormone receptor-associated protein 3	RIDISPSTFR	424.543	3	RIDIS[Phospho (ST)]PSTFR	39.01	678	687	108601	555.104	1204.55	2.17
Q9H3N1	TMX1	Thioredoxin-related transmembrane protein 1	VEEEQEADEEDVSEEEAESK	1195.45	2	VEEEQEADEEDVS[Phospho (ST)]EEEAESK	42.38	235	254	31771	86.334	187.15	2.168
O94826	TOMM70A	Mitochondrial import receptor subunit TOM70	ASPAPGSGHPEGPGAHLDMNSLDR	613.266	4	AS[Phospho (ST)]PAPGSGHPEGPGAHLDMNSLDR	76.56	90	113	67412	1812.45	3919.87	2.163	✓
O95071	UBR5	E3 ubiquitin-protein ligase UBR5	RISQSQPVR	384.198	3	RIS[Phospho (ST)]QSQPVR	30.22	1547	1555	309158	136.845	295.658	2.161	✓
P04792	HSPB1	Heat shock protein beta-1	ALSRQLSSGVSEIR	528.27	3	ALSRQLS[Phospho (ST)]SGVSEIR	57.39	76	89	22768	539.609	1153.49	2.138	✓
Q2M2I8	AAK1	AP2-associated protein kinase 1	VGSLTPPSSPK	615.263	2	VGSLT[Phospho (ST)]PPSS[Phospho (ST)]PK	40.67	616	626	93519	596.299	1267.5	2.126
Q5TAQ9	WDR42A	WD repeat-containing protein 42A	VHDRSEEEEEEEEEEEEEQPR	688.767	4	VHDRS[Phospho (ST)]EEEEEEEEEEEEEQPR	57.15	95	115	66811	295.755	628.867	2.126
Q9UQ35	SRRM2	Serine/arginine repetitive matrix protein 2	VSGRTSPPLLDR	459.903	3	VSGRTS[Phospho (ST)]PPLLDR	34.71	2393	2404	299438	642.507	1363.71	2.122	✓
Q9BRG2	SH2D3A	SH2 domain-containing protein 3A	TSSDPVLLK	520.258	2	TSS[Phospho (ST)]DPVLLK	31.49	178	186	63054	384.577	815.411	2.12
Q5TAQ9	WDR42A	WD repeat-containing protein 42A	VHDRSEEEEEEEEEEEEEQPR	918.008	3	VHDRS[Phospho (ST)]EEEEEEEEEEEEEQPR	82.44	95	115	66811	334.292	708.584	2.12
Q8WWA1	TMEM40	Transmembrane protein 40	RRGSDPASGEVEASQLR	632.298	3	RRGS[Phospho (ST)]DPASGEVEASQLR	46.71	134	150	25479	1084.64	2295.69	2.117
P04792	HSPB1	Heat shock protein beta-1	ALSRQLSSGVSEIR	528.264	3	ALSRQLS[Phospho (ST)]SGVSEIR	32.38	76	89	22768	538.084	1134.73	2.109	✓
Q96KR1	ZFR	Zinc finger RNA-binding protein	RRDSDGVDGFEAEGK	573.245	3	RRDS[Phospho (ST)]DGVDGFEAEGK	43.96	1051	1065	116939	1591.17	3332.35	2.094	✓
Q9BX95	SGPP1	Sphingosine-1-phosphate phosphatase 1	RNSLTGEEGQLAR	504.238	3	RNS[Phospho (ST)]LTGEEGQLAR	36.91	110	122	49076	1334.87	2785.74	2.087
Q9H1B7	EAP1	Enhanced at puberty protein 1	KASPEPPDSAEGALK	526.249	3	KAS[Phospho (ST)]PEPPDSAEGALK	58.27	545	559	82607	724.32	1506.62	2.08
Q9Y463	DYRK1B	Dual specificity tyrosine-phosphorylation-regulated kinase 1B	IYQYIQSR	575.77	2	IYQY[Phospho (Y)]IQSR	40.23	270	277	69154	1044.89	2161.09	2.068	✓
P35749	MYH11	Myosin-11	RVIENADGSEEETDTR	950.903	2	RVIENADGS[Phospho (ST)]EEETDTR	64.66	1946	1961	227199	258.422	530.415	2.053	✓
Q15149	PLEC1	Plectin-1	KQITMEELVR	442.888	3	KQIT[Phospho (ST)]MEELVR	53.97	4027	4036	531466	196.616	403.55	2.052	✓
P35749	MYH11	Myosin-11	RVIENADGSEEETDTR	950.893	2	RVIENADGS[Phospho (ST)]EEETDTR	41.18	1946	1961	227199	266.577	544.948	2.044	✓
Q9NQC3	RTN4	Reticulon-4	RRGSSGSVDETLFALPAASEPVIR	865.772	3	RRGSSGSVDET[Phospho (ST)]LFALPAASEPVIR	61.05	178	201	129851	124.255	252.896	2.035	✓
Q13263	TRIM28	Transcription intermediary factor 1-beta	SRSGEGEVSGLMR	730.815	2	SRS[Phospho (ST)]GEGEVSGLM[Oxidation (M)]R	37.07	471	483	88493	1647.53	3334.43	2.024
Q1KMD3	HNRNPUL2	Heterogeneous nuclear ribonucleoprotein U-like protein 2	SGDETPGSEVPGDK	727.783	2	SGDET[Phospho (ST)]PGSEVPGDK	48.95	161	174	85052	896.099	1810.63	2.021
